# Supplementary material
Source: ML conference proceedings conference paper supplement (https://proceedings.mlr.press/v32/chapados14.html)
Supplement: Supplementary file 1 [file chapados14-supp.pdf]

# Effective Bayesian Modeling of Groups of Related Count Time Series (Supplementary Material)

Nicolas Chapados

CHAPADOS@APSTAT.COM

ApSTAT Technologies Inc., 408-4200 Boul. St-Laurent, Montral, QC, H2W 2R2, CANADA

## A. Process Hyper-Priors

The following hyperpriors are used for the hierarchical model described in section 2.3:

$$\begin{aligned}
 \bar{\alpha} &\sim U(0.001, 0.1), & \mu_{\mu} &\sim \mathcal{N}(0, 2^2), \\
 \tau_{\mu} &\sim U(1, 10), & \kappa_{\tau} &\sim U(5, 10), \\
 \beta_{\tau} &\sim U(2, 25), & \kappa_{0,\tau} &\sim U(1, 5), \\
 \beta_{0,\tau} &\sim U(1, 10), & \kappa_{\theta} &\sim U(5, 10), \\
 \beta_{\theta} &\sim U(2, 25), & \phi_{+} &\sim U(1, 600), \\
 \phi_{-} &\sim U(1, 50), & \bar{\theta} &\sim \mathcal{N}(0, 1).
 \end{aligned}$$

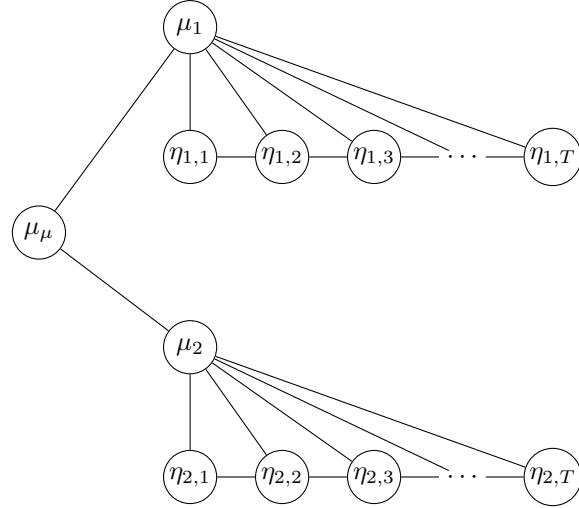

## B. Precision Matrix for Hierarchical GMRF Prior

The hierarchical model described in section 2.3 gives rise to a conditional Gaussian Markov random field (GMRF) prior over the global level of mean-reversion  $\mu_{\mu}$ , the series-specific levels of mean-reversion  $\mu_{\ell}$ ,  $\ell = 1, \dots, L$ , and the latent process log-means  $\{\eta_{\ell,t}\}$ . The GMRF prior structure for two time series is illustrated in the following graph:

In a GMRF, an edge in the graphical model corresponds to a non-zero entry in the precision matrix of the joint distribution over all variables. Hence, the precision matrix is very sparse: it has block diagonal structure, where each block corresponds to a single series. In the two-series example, assuming that each series has 4 observations, we have the following precision matrix:

$$Q = \begin{bmatrix}
 \tau_1 & -\tau_1\phi_1 & 0 & 0 & \tau_1\tilde{\phi}_1 & 0 & 0 & 0 & 0 & 0 & 0 & 0 \\
 -\tau_1\phi_1 & \tau_1(\phi_1^2 + 1) & -\tau_1\phi_1 & 0 & -\tau_1\tilde{\phi}_1^2 & 0 & 0 & 0 & 0 & 0 & 0 & 0 \\
 0 & -\tau_1\phi_1 & \tau_1(\phi_1^2 + 1) & -\tau_1\phi_1 & -\tau_1\tilde{\phi}_1^2 & 0 & 0 & 0 & 0 & 0 & 0 & 0 \\
 0 & 0 & -\tau_1\phi_1 & \tau_1 & \tau_1\tilde{\phi}_1 & 0 & 0 & 0 & 0 & 0 & 0 & 0 \\
 \tau_1\tilde{\phi}_1 & -\tau_1\tilde{\phi}_1^2 & -\tau_1\tilde{\phi}_1^2 & \tau_1\tilde{\phi}_1 & \tau_{\mu_1} + \tau_1\psi_{1,T} & 0 & 0 & 0 & 0 & 0 & 0 & -\tau_{\mu_1} \\
 \hline
 0 & 0 & 0 & 0 & 0 & \tau_2 & -\tau_2\phi_2 & 0 & 0 & \tau_2\tilde{\phi}_2 & 0 & 0 \\
 0 & 0 & 0 & 0 & 0 & -\tau_2\phi_2 & \tau_2(\phi_2^2 + 1) & -\tau_2\phi_2 & 0 & -\tau_2\tilde{\phi}_2^2 & 0 & 0 \\
 0 & 0 & 0 & 0 & 0 & 0 & -\tau_2\phi_2 & \tau_2(\phi_2^2 + 1) & -\tau_2\phi_2 & -\tau_2\tilde{\phi}_2^2 & 0 & 0 \\
 0 & 0 & 0 & 0 & 0 & 0 & 0 & -\tau_2\phi_2 & \tau_2 & \tau_2\tilde{\phi}_2 & 0 & 0 \\
 \tau_2\tilde{\phi}_2 & -\tau_2\tilde{\phi}_2^2 & -\tau_2\tilde{\phi}_2^2 & \tau_2\tilde{\phi}_2 & \tau_{\mu_2} + \tau_2\psi_{2,T} & 0 & 0 & 0 & 0 & 0 & 0 & -\tau_{\mu_2} \\
 \hline
 0 & 0 & 0 & 0 & -\tau_{\mu_1} & 0 & 0 & 0 & 0 & -\tau_{\mu_2} & \tau_{\mu_1} + \tau_{\mu_2} + \tau_{\mu_{\mu}} & 0
 \end{bmatrix}$$

where  $T = 4$  (the number of periods),  $\tilde{\phi}_1 = \phi_1 - 1$ ,

$$\tilde{\phi}_2 = \phi_2 - 1, \psi_{1,T} \equiv T - 2(T - 1)\phi_1 + (T - 2)\phi_1^2,$$

$\psi_{2,T} \equiv T - 2(T - 1)\phi_2 + (T - 2)\phi_2^2$ . The block structure is emphasized with dashed lines. The determinant of this matrix is  $\tau_{\mu_1}(\tau_{\mu_1}\tau_1^T(\phi_1^2 - 1))(\tau_{\mu_2}\tau_2^T(\phi_2^2 - 1))$ , which is

useful for computing the probability of a variable configuration.
